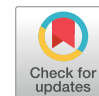

# The Association Between Diabetes and Age-Related Macular Degeneration Among the Elderly in Taiwan

Ming-Shan He,<sup>1,2</sup> Fang-Ling Chang,<sup>1</sup>  
Hong-Zin Lin,<sup>1</sup> Jung-Lun Wu,<sup>3</sup>  
Tsung-Cheng Hsieh,<sup>3</sup> and  
Yuan-Chieh Lee<sup>1,2,3</sup>

*Diabetes Care* 2018;41:2202–2211 | <https://doi.org/10.2337/dc18-0707>

## OBJECTIVE

To investigate the relationship between diabetes and future development of age-related macular degeneration (AMD).

## RESEARCH DESIGN AND METHODS

Longitudinal, retrospective cohort study data for the period between 1997 and 2012 were obtained from the Longitudinal Health Insurance Database (LHID) of Taiwan. The final available 71,904 patients with diabetes and 270,213 patients without diabetes  $\geq 50$  years of age were further matched by age, sex, and Charlson comorbidity index. In the end, 54,616 study subjects in each of the diabetes and nondiabetes groups were recruited. The stratified populations of patients with diabetes with diabetic retinopathy (DR) ( $n = 7,119$ ) versus those with diabetes who do not have DR ( $n = 7,119$ ) and populations of patients with proliferative DR (PDR) ( $n = 2,134$ ) versus those with nonproliferative DR (NPDR) ( $n = 2,134$ ) were also obtained. Competing risk regression models were used to assess the adjusted hazard ratio (HR) and 99% CI. The main outcome measures were the first-ever diagnosis of AMD during the observational period.

## RESULTS

The incidences of nonexudative AMD (HR 1.23;  $P = 0.108$ ) and exudative AMD (HR 1.37;  $P = 0.023$ ) were not significantly associated with cohorts of persons with diabetes compared with cohorts without diabetes. The stratified analysis showed that nonexudative AMD (HR 3.89;  $P = 0.001$ ) and exudative AMD (HR 3.42;  $P < 0.001$ ) were significantly correlated to diabetes with DR cohorts, compared with diabetes without DR cohorts. The incidences of nonexudative AMD (HR 0.53;  $P = 0.277$ ) and exudative AMD (HR 2.27;  $P = 0.058$ ) were not significantly different between PDR cohorts compared with NPDR cohorts.

## CONCLUSIONS

This study provides large-scale, population-based evidence that diabetes with retinopathy is independently associated with an increased risk of subsequent AMD development.

Age-related macular degeneration (AMD) is the most common cause of visual loss in elderly people all over the world (1). There are two types of AMD: nonexudative (dry) and exudative (wet). Nonexudative AMD is the most frequent type of AMD, whereas

<sup>1</sup>Department of Ophthalmology, Buddhist Tzu Chi General Hospital, Hualien, Taiwan

<sup>2</sup>Department of Ophthalmology and Visual Science, Tzu Chi University, Hualien, Taiwan

<sup>3</sup>Institute of Medical Sciences, Tzu Chi University, Hualien, Taiwan

Corresponding author: Yuan-Chieh Lee, [yuanchieh.lee@gmail.com](mailto:yuanchieh.lee@gmail.com).

Received 31 March 2018 and accepted 29 June 2018.

T.-C.H. and Y.-C.L. made an equal contribution to the work.

© 2018 by the American Diabetes Association. Readers may use this article as long as the work is properly cited, the use is educational and not for profit, and the work is not altered. More information is available at <http://www.diabetesjournals.org/content/license>.

exudative AMD represents ~10% of all AMD cases, and it is also responsible for the majority of cases with severe visual impairment and legal blindness. The global prevalence of diabetes among adults over 18 years of age rose from 4.7% in 1980 to 8.5% in 2014 (2), and the number of people who have received diagnoses of this disease is increasing rapidly worldwide. Diabetic retinopathy (DR), a common complication of diabetes, is also a major cause of visual impairment and the leading cause of blindness among working-age adults. Both AMD and DR impact patients' visual acuity and their quality of life enormously (3).

Vascular endothelial growth factor (VEGF) is a signal protein produced by cells that stimulates vasculogenesis and angiogenesis. Although the cause of disease and the typical source of neovascularization differ between AMD and DR, VEGF plays important roles in both diseases, and anti-VEGF pharmaceutical agents have proven useful in the treatment of both diseases. Although the analysis of claims data is not designed with biological conclusions in mind, these results raise the thesis that DR and AMD may share similar pathogenic features and that improving the control of diabetes may further reduce the development of AMD.

AMD is a complex disease not only with demographic and environmental risk factors but also genetic risk factors (4). Previous studies have reported various risk factors for AMD, including old age (1), white race (5), family history of AMD (1), and smoking (5). Also, it has been suggested that maintaining a normal BMI and preventing hypertension may reduce the risk of the development of AMD (5). However, to date, most of the epidemiological studies have been inconsistent regarding the association of diabetes with AMD. Some reports (5–8) have suggested an increased risk in either nonexudative or exudative AMD with diabetes; some have described the uncommon coexistence of advanced AMD and diabetes or DR; but some other studies (9–11) have found no significant correlation. Because both AMD and DR are VEGF mediated and represent the leading blindness-causing disease in the world, additional large-scale longitudinal studies, which stratify AMD into exudative and nonexudative subtypes and

focus on the relationship between AMD and diabetes, may be helpful to further clarify this controversial issue. Therefore, we used the Taiwan National Health Insurance Research Database (NHIRD) in this nationwide study with a retrospective cohort design to investigate the relationship between AMD subtypes with diabetes and subsequent retinopathy.

## RESEARCH DESIGN AND METHODS

### Data Sources

Study data for the period January 1997 to December 2012 was obtained from the Longitudinal Health Insurance Database (LHID) of Taiwan. The database contains all of the registration files and details about the original claims data for 1 million beneficiaries randomly sampled from the NHIRD, where registration data of everyone who was a beneficiary of the National Health Insurance program during the period of 1 January 2010 to 31 December 2010 were drawn for random sampling. There are ~27.38 million individuals in this registry. All data in the database are encrypted to protect the privacy of individuals. The database provides the detailed outpatient and inpatient claims data including patient identification number; birth date; sex; diagnostic codes according to the ICD-9-CM; treatment information; medical cost; dates of hospital admission and discharge; and date of death. All data sets can be interlinked through patient identification number.

### Study Cohort and Patient Selection

This study was approved by the Ethics Committee and Human Subjects Institutional Review Board of Tzu Chi Hospital, Hualien, Taiwan (TCH IRB103-39-C+). Among a total of 999,991 subjects between 1 January 1997 and 31 December 2012 in the NHIRD, 104,079 subjects with the diagnosis of diabetes (ICD-9-CM code 250) and 895,912 subjects without diabetes were initially enrolled into diabetes and nondiabetes groups, respectively, for the main study cohort. Subjects were excluded from the diabetes group if they were <50 years old ( $n = 32,046$ ) or had AMD ( $n = 130$ ) before the diagnosis of diabetes. On the other hand, 625,699 subjects <50 years of age were excluded from the nondiabetes group. To avoid confounding effect of subjects' characteristics and

comorbidities, the resulting available 71,904 patients with diabetes and 270,213 patients without diabetes were further matched in a 1:1 ratio by age, sex, and Charlson comorbidity index (CCI); finally, 54,616 study subjects in each of the diabetes and nondiabetes groups were obtained. The index date was defined as the onset date of diabetes. In addition to the main study cohort (i.e., diabetes vs. nondiabetes groups), the stratified populations with diabetes with DR (ICD-9-CM codes 362.01, 362.02;  $n = 7,119$ ) versus diabetes without DR (ICD-9-CM codes 362.01, 362.02;  $n = 7,119$ ), and proliferative DR (PDR) (ICD-9-CM code 362.01;  $n = 2,134$ ) versus nonproliferative DR (NPDR) (ICD-9-CM code 362.02;  $n = 2,134$ ) were also obtained via similar exclusion criteria and matching procedures for the subsequent stratified analysis. The detailed study data flows are described in Fig. 1.

### Outcomes Measures

The study end points were nonexudative AMD (ICD-9-CM codes 362.50, 362.51) and exudative AMD (ICD-9-CM code 362.52), as identified by the corresponding ICD-9-CM codes. When both eyes of a participant had lesions of different severities, the grade assigned for the participant was that of the more severely involved eye. All outcomes were assessed during the entire follow-up period between the index date and 31 December 2011. Baseline comorbidities were identified via ICD-9 codes, which included CCI, hypertension (codes 401.X–405.X, 437.2, 362.11), and hyperlipidemia (code 272.X).

### Statistical Analysis

Patient demographic data, including age (51–60, 61–70, and  $\geq 71$  years), sex, hypertension, hyperlipidemia, and the CCI score were compared between the study cohort and control groups via standard difference. The demographic variables with a standard difference of  $>0.1$  were considered to represent clinically meaningful differences. The 10,000 person-year incidence of both study groups and control groups were calculated. Competing risk-adjusted Cox regression models were used to assess adjusted hazard ratios (HRs) and 99% CI. SAS statistical software (SAS System for Windows, version 9.3; SAS Institute,

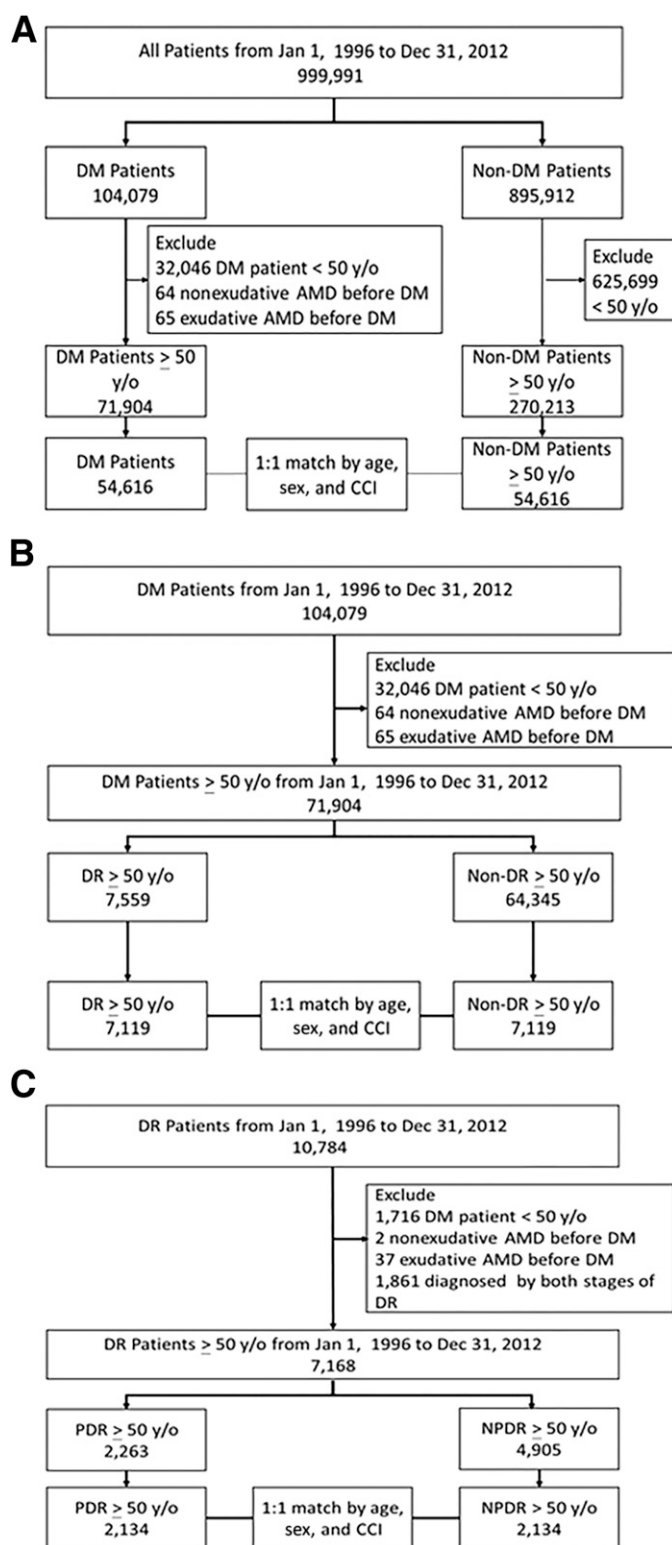

**Figure 1**—Study protocol and profile. A: The selection flow chart and selected populations for diabetes group and the control cohort. B: The stratification flow chart and the stratified populations for diabetes with DR vs. diabetes without DR. C: The stratification flow chart and the stratified populations for PDR vs. nonPDR. DM, diabetes mellitus; y/o, years old.

Cary, NC) was used for the statistical analysis. All statistical tests were two sided, and a  $P$  value of  $<0.01$  was considered to be statistically significant.

## RESULTS

### Diabetes Versus Nondiabetes

After matching by sex, age, and CCI, the final analysis included 54,616 patients

with diabetes and 54,616 patients without diabetes (Fig. 1A). The distributions of demographic characteristics and comorbidities for these two cohorts are shown in Table 1. Patients with diabetes were more likely to have claims for chronic comorbidities, including hypertension (52.5% vs. 27.9%) and hyperlipidemia (31.6% vs. 12.5%), with standard differences of 0.52 and 0.47, respectively. During the follow-up period of 15 years, the overall mean annual incidence of nonexudative AMD was higher in patients with diabetes than in patients without diabetes (33.7/10,000 person-years to 23.5/10,000 person-years in the period of 1996–2012; incidence ratio 1.4). Similar trends were also observed in exudative AMD (3.5/10,000 person-years to 2.5/10,000 person-years; incidence ratio 1.4) (Table 2).

In multivariate survival analysis, patients with diabetes did not show significantly increased risk of subsequent nonexudative AMD development (HR 1.23; 99% CI 0.88–1.70;  $P = 0.108$ ) except for CCI total (HR 1.27; 99% CI 1.20–1.34;  $P < 0.001$ ), which was independently associated with increased risk of subsequent nonexudative AMD. For exudative AMD, CCI total (HR 1.23; 99% CI 1.13–1.35;  $P < 0.001$ ) and male sex (HR 1.65; 99% CI 1.19–2.30;  $P < 0.001$ ) both had a significantly higher incidence of subsequent exudative AMD. Although diabetes seemed to add to the risk of exudative AMD development, the statistical analysis result was not significant (HR 1.37; 99% CI 0.96–1.97;  $P = 0.023$ ). In contrast, the difference in the risk of the development of subsequent either nonexudative or exudative AMD was not significantly associated with hypertension or hyperlipidemia (Table 3).

### Diabetes With DR Versus Diabetes Without DR

After including control subjects matched 1:1 by sex, age, and CCI, the final analysis included 7,119 patients with diabetes with retinopathy and 7,119 patients with diabetes without retinopathy (Fig. 1B). The distributions of demographic characteristics and comorbidities for these two cohorts are shown in Table 1. Patients with diabetes with DR were more likely to have claims for chronic comorbidities, including hypertension (74.8% vs. 65.1%) and hyperlipidemia (52.0% vs. 42.0%) than those without

Table 1—Characteristics of the study population

| Variable       | Category           | Statistic | Diabetes vs. nondiabetes |                |                | Diabetes w/DR vs. diabetes w/o DR |                 |                |  | PDR vs. NPDR   |                |                |
|----------------|--------------------|-----------|--------------------------|----------------|----------------|-----------------------------------|-----------------|----------------|--|----------------|----------------|----------------|
|                |                    |           | Diabetes                 | Nondiabetes    | Standard Diff. | Diabetes w/ DR                    | Diabetes w/o DR | Standard Diff. |  | PDR            | NPDR           | Standard Diff. |
| Sex            | Female             | n (%)     | 27,581 (50.5)            | 27,581 (50.5)  | 0.00           | 4,089 (57.4)                      | 4,089 (57.4)    | 0.00           |  | 1,147 (53.1)   | 1,147 (53.1)   | 0.00           |
|                | Male               | n (%)     | 27,035 (49.5)            | 27,035 (49.5)  |                | 3,030 (42.5)                      | 3,030 (42.5)    |                |  | 987 (46.2)     | 987 (46.2)     |                |
| Age, years     | Mean $\pm$ SD      |           | 62.3 $\pm$ 9.0           | 62.3 $\pm$ 9.0 | 0.01           | 66.4 $\pm$ 7.9                    | 66.4 $\pm$ 7.9  | 0.001          |  | 63.3 $\pm$ 8.1 | 63.3 $\pm$ 8.1 | 0.00           |
|                | 50 < age $\leq$ 60 | n (%)     | 26,109 (47.8)            | 26,154 (47.9)  | 0.11           | 1,632 (22.9)                      | 1,624 (22.8)    | 0.02           |  | 856 (40.1)     | 862 (40.3)     | 0.00           |
|                | 60 < age $\leq$ 70 | n (%)     | 17,219 (31.5)            | 17,148 (31.4)  |                | 3,181 (44.6)                      | 3,195 (44.8)    |                |  | 804 (37.6)     | 797 (37.3)     |                |
|                | age > 70           | n (%)     | 11,288 (20.6)            | 11,314 (20.7)  |                | 2,306 (32.3)                      | 2,300 (32.3)    |                |  | 474 (22.2)     | 475 (22.2)     |                |
| CCI total      | Mean $\pm$ SD      |           | 2.8 $\pm$ 1.0            | 2.7 $\pm$ 0.9  | 0.044          | 4.8 $\pm$ 4.7                     | 4.8 $\pm$ 4.7   | 0              |  | 4.4 $\pm$ 1.9  | 4.4 $\pm$ 1.9  | 0.00           |
| Hypertension   | n (%)              |           | 28,687 (52.5)            | 15,259 (27.9)  | 0.52           | 5,331 (74.8)                      | 4,637 (65.1)    | 0.21           |  | 1,570 (73.5)   | 1,567 (73.4)   | 0.00           |
| Hyperlipidemia | n (%)              |           | 17,270 (31.6)            | 6,871 (12.5)   | 0.47           | 3,706 (52.0)                      | 2,994 (42.0)    | 0.20           |  | 1,106 (51.8)   | 1,237 (57.9)   | −0.12          |

Diff., difference; w/o, without; w/, with.

DR. During a follow-up period of 17 years, the overall mean annual incidence of nonexudative AMD was significantly correlated to patients with diabetes with DR, compared with patients with diabetes without retinopathy (8.7/10,000 person-years to 2.2/10,000 person-years in the period of 1996–2012; incidence ratio 4.0). Similar trends can also be observed in patients with exudative AMD (12.1/10,000 person-years to 3.1/10,000 person-years; incidence ratio 3.9) (Table 2).

In multivariate survival analysis, we found that diabetes with DR was independently associated with an increased risk of subsequent nonexudative AMD (HR 3.89; 99% CI 1.35–11.23;  $P = 0.001$ ). However, the difference in the risk of the development of subsequent nonexudative AMD was not significant for sex, CCI total, hypertension, or hyperlipidemia variants. Similarly, patients with DR also showed an increased risk of subsequent exudative AMD (HR 3.42; 99% CI 1.48–7.90;  $P < 0.001$ ). Male sex also had a significantly higher incidence of subsequent exudative AMD (HR 2.05; 99% CI 1.06–3.99;  $P = 0.005$ ) as a variant; whereas CCI total, hypertension and hyperlipidemia did not (Table 3).

#### Development of AMD in Different Stages of DR

We further stratified patients with DR by the presence or lack of retinal neovascularization into NPDR and PDR. After matching by sex, age, and CCI, the final analysis included 2,134 patients with NPDR and 2,134 patients with PDR (Fig. 1C). The distributions of demographic characteristics and comorbidities of these two cohorts are shown in Table 1. The overall mean annual incidences of nonexudative AMD were lower with patients with PDR compared with patients with NPDR (4.2/10,000 person-years to 7.3/10,000 person-years; incidence ratio 0.6), but multivariate analysis did not show any difference between patients with PDR and those with NPDR. In contrast, the annual incidence of exudative AMD was significantly higher in patients with PDR than in patients with NPDR (14/10,000 person-years to 4.6/10,000 person-years; incidence ratio 3.0) (Table 2). However, in multivariate survival analysis, the trend toward the development of exudative AMD in patients with PDR was not statistically significant (HR 2.27; 99% CI 0.74–6.92;  $P = 0.058$ ).





**Table 3—Predictors of two types of AMD by multivariate analysis**

| Outcome          | Effect             | Diabetes vs. nondiabetes |         | Diabetes w/ DR vs. diabetes w/o DR |         | PDR vs. NPDR     |         |
|------------------|--------------------|--------------------------|---------|------------------------------------|---------|------------------|---------|
|                  |                    | HR (99% CI)              | P value | HR (99% CI)                        | P value | HR (99% CI)      | P value |
| Nonexudative AMD | Group              | 1.23 (0.88–1.70)         | 0.108   | 3.89 (1.35–11.23)                  | 0.001   | 0.53 (0.12–2.36) | 0.277   |
|                  | Sex (ref.: female) | 1.34 (0.98–1.82)         | 0.015   | 1.45 (0.70–3.01)                   | 0.189   | 0.78 (0.21–2.90) | 0.624   |
|                  | CCI total          | 1.27 (1.20–1.34)         | <0.001  | 1.08 (0.90–1.31)                   | 0.282   | 0.81 (0.52–1.27) | 0.234   |
|                  | Hypertension       | 1.15 (0.83–1.60)         | 0.277   | 1.16 (0.45–2.97)                   | 0.693   | 1.31 (0.32–5.28) | 0.621   |
|                  | Hyperlipidemia     | 1.19 (0.80–1.78)         | 0.265   | 0.72 (0.34–1.52)                   | 0.253   | 1.17 (0.30–4.50) | 0.766   |
| Exudative AMD    | Group              | 1.37 (0.96–1.97)         | 0.023   | 3.42 (1.48–7.90)                   | <0.001  | 2.27 (0.74–6.92) | 0.058   |
|                  | Sex (ref.: female) | 1.65 (1.19–2.30)         | <0.001  | 2.05 (1.06–3.99)                   | 0.005   | 2.54 (0.82–7.92) | 0.034   |
|                  | CCI total          | 1.23 (1.13–1.35)         | <0.001  | 1.06 (0.92–1.22)                   | 0.318   | 1.00 (0.81–1.24) | 0.975   |
|                  | Hypertension       | 0.99 (0.68–1.43)         | 0.919   | 0.83 (0.39–1.77)                   | 0.519   | 0.87 (0.26–2.88) | 0.761   |
|                  | Hyperlipidemia     | 1.12 (0.72–1.75)         | 0.512   | 1.30 (0.70–2.40)                   | 0.275   | 1.06 (0.36–3.08) | 0.898   |

Groups: Diabetes vs. nondiabetes: diabetes (reference: nondiabetes); diabetes w/DR vs. diabetes w/o DR: diabetes w/DR (reference: diabetes w/o DR); PDR vs. NPDR: PDR (reference: NPDR). w/, with; w/o, without.

About 0.4% of people between 50 and 60 years of age have the disease, whereas it occurs in 0.7% of people between 60 and 70 years of age, 2.3% of those 70–80 years of age, and nearly 12% of those >80 years of age (25). Patients with AMD in the study by Hahn et al. (12) were >69 years of age, which neglected patients 50–69 years of ages and might not fully represent the distribution of AMD patients. According to the Centers for Disease Control and Prevention reports on 2012, adults 45–64 years of age were the age group receiving the most diagnoses of diabetes. Patients with newly diagnosed diabetes in the study by Hahn et al. (12) were >69 years of age, which might not completely represent the incidence of AMD in patients with diabetes. Considering the younger onset of diabetes, we included subjects as young as 50 years of age and those without AMD before the onset of diabetes. Furthermore, we took follow-up time and censored cases into consideration, and used a Cox regression model to analyze the longitudinal data.

In our study, patients with diabetes had a 1.4-fold increased the incidence of nonexudative and exudative AMD over matched patients without diabetes, but the difference did not reach significance in multivariate survival analysis. In contrast, patients with diabetes with DR had a 4-fold increased incidence of nonexudative AMD, and a 3.9-fold increased incidence of exudative AMD over patients with diabetes without DR. The HR of the development of nonexudative AMD was 3.89 for patients with diabetes with DR compared with patients with diabetes without DR ( $P = 0.001$ ). The HR

of the development of exudative AMD was 3.42 for patients with diabetes with DR compared with patients with diabetes without DR ( $P < 0.001$ ).

DR is generally considered to be a disease of the inner retina, in contrast to the outer retinal involvement in AMD, but there may be features common to both diseases. Macular RPE abnormalities and increased area of drusen have been correlated with increased blood glucose levels, impaired glucose tolerance, and advanced glycation end products (27). Moreover, both exudative AMD and DR appear to be VEGF mediated, and the use of anti-VEGF pharmaceutical agents has proven useful in the treatment of both diseases. Similar observations in component molecules of extracellular depositions and clinical progression courses between AMD and diabetes give support to the hypothesis that AMD is significantly associated with diabetes. Furthermore, a high dietary glycemic index (dGI) was found, in a cross-sectional analysis of the AREDS cohort, to be associated with an increased risk of early and late AMD in subjects without diabetes (28). The dGI is a weighted average of the glycemic index of foods in the diet. High dGI is an indicator of poor quality dietary carbohydrate intake and has been implicated in the development of diabetes and cardiovascular disease. It may increase the risk of AMD through several common etiological factors of diabetes and cardiovascular disease, including the formation of advanced glycation end products and increases in oxidative stress, inflammation, and hyperlipidemia.

Diabetes-related changes in the function and structure of the RPE, Bruch membrane, and the choroidal circulation have been hypothesized to increase the risk of AMD. Histopathological studies in the eyes of subjects with long-term diabetes have shown thickening of the basement membrane of the choriocapillary walls, luminal narrowing, dropout of the choriocapillaries, and thickening of the Bruch membrane, all of which are factors that may predispose a subject to the development of AMD (29). Subfoveal choroidal blood flows have been found to be reduced in patients with both NPDR and PDR (30).

It has been demonstrated that systemic inflammation is an intrinsic response to overfeeding, obesity, and diabetes. The latter increases the release of retinal inflammatory mediators (interleukin [IL]-1 $\beta$ , tumor necrosis factor- $\alpha$  [TNF- $\alpha$ ], intercellular adhesion molecule [ICAM-1], MCP-1, and angiotensin II) (31) and activation of microglial cells (32) in early retinopathy. Similarly, several studies have found an association between AMD and inflammation. Cellular remnants and debris from degenerated RPE, sequestered between the RPE basal lamina and Bruch membrane, may constitute a chronic inflammatory stimulus (33). A number of inflammatory cytokines have been found to be elevated either systemically in the serum or locally in the ocular tissue or fluids of patients with AMD. Systemic levels of IL-6, IL-8, and TNF- $\alpha$  correlated with complement factor H haplotypes in AMD patients. Concentrations of MCP-1 and ICAM-1 are significantly

**Table 4—Review of studies investigating the relationship between diabetes or DR and AMD**

|                 | Study name                       | Type of study                                         | Enrollees, <i>n</i> | Age, years | Major findings                                                                                                                                                                                                                                                                                                                                                                                                                         |
|-----------------|----------------------------------|-------------------------------------------------------|---------------------|------------|----------------------------------------------------------------------------------------------------------------------------------------------------------------------------------------------------------------------------------------------------------------------------------------------------------------------------------------------------------------------------------------------------------------------------------------|
| Longitudinal    | AREDS (5)                        | Prospective cohort study                              | 3,294               | 55–80      | Increased incidence of diabetes in patients at risk for development of advanced AMD in each eye (OR 1.88)                                                                                                                                                                                                                                                                                                                              |
|                 | BES (7)                          |                                                       | 2,793               | 40–84      | Trend toward increased 9-year incidence of late AMD in patients with diabetes vs. control subjects (age-adjusted relative risk 2.7; <i>P</i> = 0.054)                                                                                                                                                                                                                                                                                  |
|                 | Voutilainen-Kaunisto et al. (25) |                                                       | 277                 | 45–64      | No association between 10-year incidence of AMD and diabetes                                                                                                                                                                                                                                                                                                                                                                           |
|                 | Hahn et al. (12)                 | Retrospective cohort study                            | 16,174              | >69        | Increased 10-year incidence of dry AMD in NPDR vs. control subjects (HR 1.24); increased 10-year incidence of wet AMD in NPDR vs. control (HR 1.68) and PDR vs. control subjects (HR 2.15); diabetes without retinopathy did not affect risk of dry or wet AMD; there was no difference in risk of wet AMD in PDR compared with NPDR                                                                                                   |
|                 | He et al. (current study)        |                                                       | 109,232             | ≥50        | A tendency toward a greater risk of dry AMD (HR 1.23; <i>P</i> = 0.108) and wet AMD (HR 1.37; <i>P</i> = 0.023) in patients with diabetes vs. those without diabetes, but the difference did not reach significance at a significance level of 1%; dry AMD (HR 3.89) and wet AMD (HR 3.42) were significantly correlated to patients with diabetes with DR, compared with those with diabetes without DR at a significance level of 1% |
| Cross-sectional | BDES (6)                         | Cross-sectional population based                      | 4,695               | 43–86      | Increased prevalence of wet AMD in male patients with diabetes >75 years of age (OR 10.2) compared with control subjects                                                                                                                                                                                                                                                                                                               |
|                 | EUREYE Study (8)                 |                                                       | 4,522               | >65        | Increased prevalence of diabetes in exudative AMD vs. control subjects (OR 1.81)                                                                                                                                                                                                                                                                                                                                                       |
|                 | BMES (18)                        |                                                       | 3,228               | 49–97      | No significant association between patients with or without diabetes for exudative AMD (OR 1.2) and early AMD (OR 1.0)                                                                                                                                                                                                                                                                                                                 |
|                 | Framingham Eye Study (26)        |                                                       | 2,477               | 52–85      | No association between patients with diabetes and those with AMD                                                                                                                                                                                                                                                                                                                                                                       |
|                 | Choi et al. (13)                 |                                                       | 3,008               | 50–87      | Patients with diabetes were more likely to have early AMD (OR 1.87) than those without diabetes                                                                                                                                                                                                                                                                                                                                        |
|                 | Klein et al. (14)                | Observational analysis of a randomized clinical trial | 4,288               | ≥63        | No significant association between patients with and without diabetes for early AMD (OR 0.87); significant association between patients with and without diabetes for late AMD (OR 2.43) and exudative AMD (OR 2.49)                                                                                                                                                                                                                   |
| Case-control    | Borrone et al. (20)              | Retrospective descriptive observational case control  | 399                 | >65        | Lower prevalence of late AMD in patients with diabetes vs. control subjects in persons >75 years of age                                                                                                                                                                                                                                                                                                                                |
|                 | Maltzman et al. (22)             | Case-control studies                                  | 60                  | 52–88      | No association between patients with diabetes and those with AMD                                                                                                                                                                                                                                                                                                                                                                       |
|                 | Hyman et al. (23)                |                                                       | 465                 |            |                                                                                                                                                                                                                                                                                                                                                                                                                                        |
|                 | Blumenkranz et al. (24)          |                                                       | 49                  |            |                                                                                                                                                                                                                                                                                                                                                                                                                                        |
|                 | Cackett et al. (40)              |                                                       | 1,790               | >60        | Diabetes was not significantly associated with wet AMD (OR 0.9)                                                                                                                                                                                                                                                                                                                                                                        |

B, black; H, Hispanic; M, Mexican.

associated with exudative AMD, even in the presence of normal VEGF concentrations (34).

Several inflammatory mediators such as ICAM-1, MCP-1, IL-1 $\beta$ , IL-8, and TNF- $\alpha$  play a part in both DR and AMD, and

the release of these cytokines into the intraocular tissue in DR patients may promote the development of AMD.

**A** Nonexudative AMD (hazard ratio)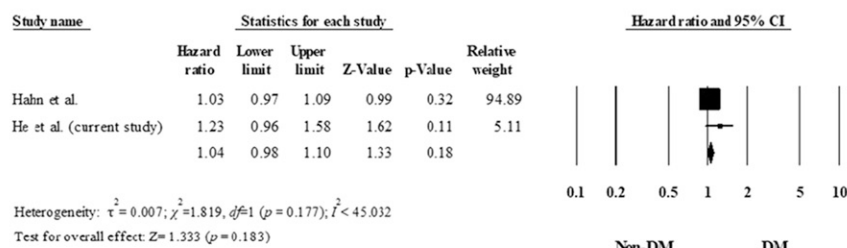**B** Exudative AMD (hazard ratio)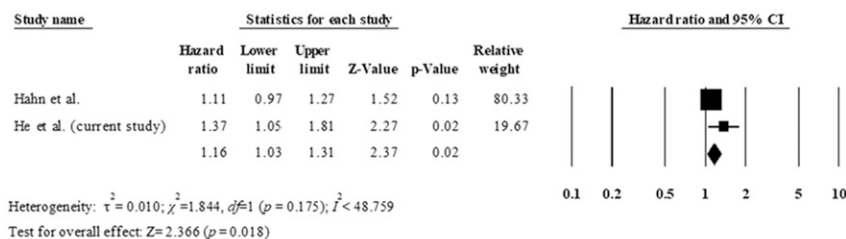**C** Exudative AMD (odds ratio)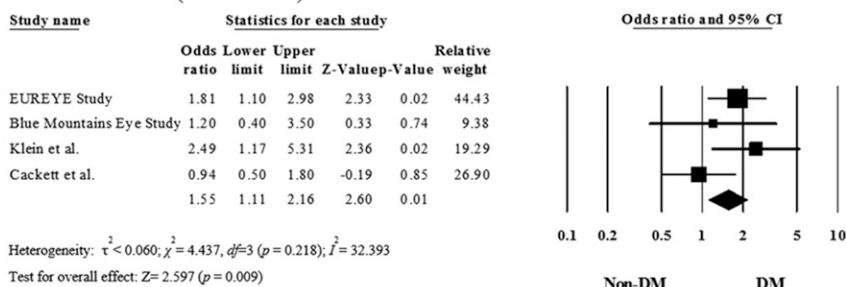**D** Early AMD (odds ratio)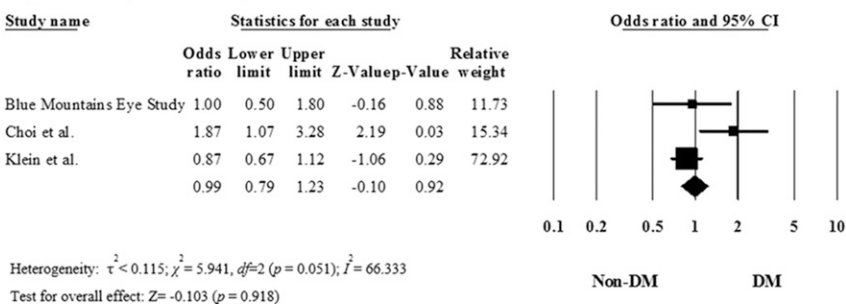**E** Late AMD (odds ratio)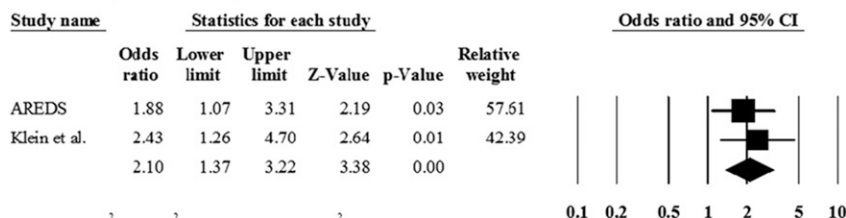

**Figure 2**—Meta-analysis for the selected studies with the same comparison between patients with diabetes and control subjects in Table 4. A: The HR for nonexudative AMD. B: The HR for exudative AMD. C: The OR for exudative AMD. D: The OR for early AMD. E: The OR for late AMD. DM, diabetes mellitus. AREDS (5), Blue Mountains Eye Study (18), Cackett et al. (40), Choi et al. (13), EUREYE Study (8), Hahn et al. (12), Klein et al. (14).

Our results revealed that patients with diabetes had a tendency toward a greater risk of nonexudative and exudative AMD than the matched control subjects. This trend was intensified when DR

developed in these patients with diabetes. The development of DR means the breakdown of the blood-retina barrier. A large amount of evidence supports the role of proinflammatory cytokines,

chemokines, and other inflammatory mediators in the pathogenesis of DR as leading to persistent low-grade inflammation, and subsequent influx of leukocytes as further contributing to the



damage of the retinal vasculature and neovascularization. These released inflammatory mediators in DR may further trigger the pathogenesis of AMD, thus increasing the likelihood of AMD in this group.

We also found that the overall mean annual incidence of nonexudative AMD was significantly lower with PDR patients compared with NPDR patients (incidence ratio 0.6), although this did not show a significant difference in multivariate analysis ( $P = 0.277$ ). In contrast, exudative AMD had a trend toward association with PDR patients compared with NPDR patients (incidence ratio 3.0), and multivariate analysis also showed the tendency, but it was not statistically significant (HR 2.27; 99% CI 0.74–6.92;  $P = 0.058$ ). Retinas or vitreous from patients with PDR have been found to contain elevated levels of a variety of inflammatory mediators, including TNF- $\alpha$ , IL-6, VEGF, and matrix metalloproteinase (MMP)-9 (35,36). MMPs and their tissue inhibitors also play a central role in the pathogenesis of AMD (37). The expression of MMP-9, TNF- $\alpha$ , IL-6, and VEGF in patients with PDR may further expose the eye to development of choroidal neovascularization, thus increasing the coincidence of exudative AMD. Since patients with PDR have more severe pathology and inflammation than patients with NPDR, it is reasonable that our study revealed a tendency for development of exudative AMD in patients with PDR compared with patients with NPDR. The results are also consistent with a large longitudinal cohort analysis by Hahn et al. (12), which showed an association between newly diagnosed NPDR and an increased risk of incident diagnosis of dry AMD and wet AMD; whereas newly diagnosed PDR was associated with a significantly increased risk of wet AMD only.

This study exhibits several strengths. First, the NHIRD contains all claims data that were recorded electronically, ensuring accuracy and avoiding recall bias. Second, analyzing data from the NHIRD provided us with population-based and representative claims information of insured people in Taiwan and reduced the likelihood of selection bias. Third, the large size of the data set and longitudinal study design provided considerable statistical power and enabled us to detect differences between the AMD and control cohorts more effectively.

### Study Limitations

First, the NHIRD is an administrative database and lacks direct imaging and laboratory results. Although the proportion of exudative AMD among overall AMD in our study is consistent with previous findings (10–15%) in the published literature (38), the identification accuracy for AMD is still a concern. The AMD cases identified on the basis of ICD-9 codes were less accurate than those identified individually through standardized procedures. Polypoidal choroidal vasculopathy (PCV), a distinct variant of type 1 choroidal neovascularization, is considerably prevalent in East Asian populations (39). In addition, without an ICD-9 diagnosis code specific for PCV, the identification of the patients with PCV from among those with exudative AMD was almost impossible in the NHIRD data set. Second, although the current retrospective cohort study is more efficient than a prospective design study because it makes use of the retrospective data. However, unlike a prospective study, some of potential risk factors cannot be obtained since it is based on the retrospective data. Some important factors, such as educational level, drinking and smoking habits, BMI, visual acuity, severity of comorbid diseases, family history of diabetes, are not available in the NHIRD, which might confound our results. Third, early AMD might be asymptomatic, and the individuals with early AMD might not have received diagnosis, which could lead to a misclassification bias in this study. However, this nondifferential misclassification would bias our results toward the null and dilute the real difference in AMD incidence between these two cohorts. Fourth, early-stage diabetes might also be underdiagnosed, which could result in group misclassification in both cohorts. Finally, most of our study subjects were ethnically Chinese people from Taiwan, and the generalizability of our results to other ethnic groups needs to be further confirmed.

### Conclusion

Our study provides large-scale, population-based evidence in support of an independent relationship between overall diabetes and incident AMD in Taiwan. An important strength of our study is the large, nationally representative sample size, which yielded ample statistical power and allowed us to distinguish between diabetes and different types of

retinopathy. Furthermore, the stratified analysis showed that patients with DR were at significantly greater risk of subsequent development of AMD than the matched control subjects. These results raise the possibility that DR and AMD may share pathogenic features and that preventing DR in patients with diabetes may reduce further development of AMD. Further studies should be undertaken to gain a better understanding of these disease processes.

**Funding.** This study was supported by a research grant from Buddhist Tzu Chi General Hospital, Hualien, Taiwan (TCRD103-48).

Buddhist Tzu Chi General Hospital Medical Research Program had no role in the design and conduct of the study; collection, management, analysis, and interpretation of the data; preparation, review, or approval of the manuscript; or decision to submit the manuscript for publication.

**Duality of Interest.** No potential conflicts of interest relevant to this article were reported.

**Author Contributions.** M.-S.H. contributed to administrative, technical, or material support; study concept and design; acquisition, analysis, or interpretation of the data; statistical analysis; drafting of the manuscript; and critical revision of the manuscript for important intellectual content and obtained funding. F.-L.C. contributed to administrative, technical, or material support; acquisition, analysis, or interpretation of the data; critical revision of the manuscript for important intellectual content; and supervision of the study and obtained funding. H.-Z.L. contributed to administrative, technical, or material support; acquisition, analysis, or interpretation of the data; and supervision of the study and obtained funding. J.-L.W. contributed to administrative, technical, or material support; acquisition, analysis, or interpretation of the data; statistical analysis; and supervision of the study. T.-C.H. contributed to the concept and design of the study; the acquisition, analysis, or interpretation of data; statistical analysis; the drafting of the manuscript; critical revision of the manuscript for important intellectual content; supervision of the study and obtained funding. Y.-C.L. contributed to the acquisition, analysis, or interpretation of data; critical revision of the manuscript for important intellectual content; concept and design of the study; drafting of the manuscript; and supervision of the study and obtained funding. M.-S.H. and Y.-C.L. are the guarantors of this work and, as such, had full access to all the data in the study and take responsibility for the integrity of the data and the accuracy of the data analysis.

### References

1. Chakravarthy U, Wong TY, Fletcher A, et al. Clinical risk factors for age-related macular degeneration: a systematic review and meta-analysis. *BMC Ophthalmol* 2010;10:31

2. World Health Organization. *Global Report on Diabetes*. Geneva, Switzerland, World Health Organization, 2016
3. Brody BL, Gamst AC, Williams RA, et al. Depression, visual acuity, comorbidity, and disability associated with age-related macular degeneration. *Ophthalmology* 2001;108:1893–1900; discussion 1900–1901
4. Yang Z, Camp NJ, Sun H, et al. A variant of the HTRA1 gene increases susceptibility to age-related macular degeneration. *Science* 2006;314:992–993
5. Clemons TE, Milton RC, Klein R, Seddon JM, Ferris FL III; Age-Related Eye Disease Study Research Group. Risk factors for the incidence of advanced age-related macular degeneration in the Age-Related Eye Disease Study (AREDS): AREDS report no. 19. *Ophthalmology* 2005;112:533–539
6. Klein R, Klein BE, Moss SE. Diabetes, hyperglycemia, and age-related maculopathy. The Beaver Dam Eye Study. *Ophthalmology* 1992;99:1527–1534
7. Leske MC, Wu SY, Hennis A, et al.; Barbados Eye Studies Group. Nine-year incidence of age-related macular degeneration in the Barbados Eye Studies. *Ophthalmology* 2006;113:29–35
8. Topouzis F, Anastasopoulos E, Augood C, et al. Association of diabetes with age-related macular degeneration in the EUREYE study. *Br J Ophthalmol* 2009;93:1037–1041
9. Tomany SC, Wang JJ, Van Leeuwen R, et al. Risk factors for incident age-related macular degeneration: pooled findings from 3 continents. *Ophthalmology* 2004;111:1280–1287
10. Chen S-J, Cheng C-Y, Peng K-L, et al. Prevalence and associated risk factors of age-related macular degeneration in an elderly Chinese population in Taiwan: the Shihpai Eye Study. *Invest Ophthalmol Vis Sci* 2008;49:3126–3133
11. You QS, Xu L, Yang H, et al. Five-year incidence of age-related macular degeneration: the Beijing Eye Study. *Ophthalmology* 2012;119:2519–2525
12. Hahn P, Acquah K, Cousins SW, Lee PP, Sloan FA. Ten-year incidence of age-related macular degeneration according to diabetic retinopathy classification among medicare beneficiaries. *Retina* 2013;33:911–919
13. Choi JK, Lym YL, Moon JW, Shin HJ, Cho B. Diabetes mellitus and early age-related macular degeneration. *Arch Ophthalmol* 2011;129:196–199
14. Klein R, Deng Y, Klein BEK, et al. Cardiovascular disease, its risk factors and treatment, and age-related macular degeneration: Women's Health Initiative Sight Exam ancillary study. *Am J Ophthalmol* 2007;143:473–483
15. Davis MD, Gangnon RE, Lee LY, et al.; Age-Related Eye Disease Study Group. The Age-Related Eye Disease Study severity scale for age-related macular degeneration: AREDS Report No. 17. *Arch Ophthalmol* 2005;123:1484–1498
16. Chen X, Rong SS, Xu Q, et al. Diabetes mellitus and risk of age-related macular degeneration: a systematic review and meta-analysis. *PLoS One* 2014;9:e108196
17. Klein R, Klein BE, Tomany SC, Moss SE. Ten-year incidence of age-related maculopathy and smoking and drinking: the Beaver Dam Eye Study. *Am J Epidemiol* 2002;156:589–598
18. Mitchell P, Wang JJ. Diabetes, fasting blood glucose and age-related maculopathy: the Blue Mountains Eye Study. *Aust N Z J Ophthalmol* 1999;27:197–199
19. Chiu C-J, Milton RC, Klein R, Gensler G, Taylor A. Dietary carbohydrate and the progression of age-related macular degeneration: a prospective study from the Age-Related Eye Disease Study. *Am J Clin Nutr* 2007;86:1210–1218
20. Borroni R, Saravia M, Bar D. Age related maculopathy and diabetes. *Eur J Ophthalmol* 2008;18:949–954
21. Zylbermann R, Landau D, Rozenman Y, Abrahami S, Pollack A. Exudative age-related macular degeneration in patients with diabetic retinopathy and its relation to retinal laser photocoagulation. *Eye (Lond)* 1997;11:872–875
22. Maltzman BA, Mulvihill MN, Greenbaum A. Senile macular degeneration and risk factors: a case-control study. *Ann Ophthalmol* 1979;11:1197–1201
23. Hyman LG, Lilienfeld AM, Ferris FL III, Fine SL. Senile macular degeneration: a case-control study. *Am J Epidemiol* 1983;118:213–227
24. Blumenkranz MS, Russell SR, Robey MG, Kott-Blumenkranz R, Penneys N. Risk factors in age-related maculopathy complicated by choroidal neovascularization. *Ophthalmology* 1986;93:552–558
25. Voutilainen-Kaunisto RM, Teräsvirta ME, Uusitupa MI, Niskanen LK. Age-related macular degeneration in newly diagnosed type 2 diabetic patients and control subjects: a 10-year follow-up on evolution, risk factors, and prognostic significance. *Diabetes Care* 2000;23:1672–1678
26. Kahn HA, Leibowitz HM, Ganley JP, et al. The Framingham Eye Study. II. Association of ophthalmic pathology with single variables previously measured in the Framingham Heart Study. *Am J Epidemiol* 1977;106:33–41
27. Algvær P, Efendić S, Luft R, Wajngot A. Retinal microangiopathy and pigment epithelial lesions in subjects with normal, borderline, and decreased oral glucose tolerance. *Br J Ophthalmol* 1985;69:416–419
28. Chiu C-J, Milton RC, Gensler G, Taylor A. Association between dietary glycemic index and age-related macular degeneration in nondiabetic participants in the Age-Related Eye Disease Study. *Am J Clin Nutr* 2007;86:180–188
29. Hidayat AA, Fine BS. Diabetic choroidopathy. Light and electron microscopic observations of seven cases. *Ophthalmology* 1985;92:512–522
30. Nagaoka T, Kitaya N, Sugawara R, et al. Alteration of choroidal circulation in the foveal region in patients with type 2 diabetes. *Br J Ophthalmol* 2004;88:1060–1063
31. Hotamisligil GS. Inflammation and metabolic disorders. *Nature* 2006;444:860–867
32. Zeng HY, Green WR, Tso MO. Microglial activation in human diabetic retinopathy. *Arch Ophthalmol* 2008;126:227–232
33. Donoso LA, Kim D, Frost A, Callahan A, Hageman G. The role of inflammation in the pathogenesis of age-related macular degeneration. *Surv Ophthalmol* 2006;51:137–152
34. Jonas JB, Tao Y, Neumaier M, Findeisen P. Monocyte chemoattractant protein 1, intercellular adhesion molecule 1, and vascular cell adhesion molecule 1 in exudative age-related macular degeneration. *Arch Ophthalmol* 2010;128:1281–1286
35. Adamiec-Mroczek J, Oficjalska-Młyńczak J, Misiuk-Hojło M. Roles of endothelin-1 and selected proinflammatory cytokines in the pathogenesis of proliferative diabetic retinopathy: analysis of vitreous samples. *Cytokine* 2010;49:269–274
36. Jin M, Kashiwagi K, Iizuka Y, Tanaka Y, Imai M, Tsukahara S. Matrix metalloproteinases in human diabetic and nondiabetic vitreous. *Retina* 2001;21:28–33
37. Fiotti N, Pedio M, Battaglia Parodi M, et al. MMP-9 microsatellite polymorphism and susceptibility to exudative form of age-related macular degeneration. *Genet Med* 2005;7:272–277
38. Jager RD, Mieler WF, Miller JW. Age-related macular degeneration. *N Engl J Med* 2008;358:2606–2617
39. Tsai DC, Chen SJ, Huang CC, Yuan MK, Leu HB. Age-related macular degeneration and risk of degenerative Dementia among the Elderly in Taiwan: a population-based cohort Study. *Ophthalmology* 2015;122:2327–2335.e2
40. Cackett P, Yeo I, Cheung CM, et al. Relationship of smoking and cardiovascular risk factors with polypoidal choroidal vasculopathy and age-related macular degeneration in Chinese persons. *Ophthalmology* 2011;118:846–852
